# Supplementary material for: Stratification of clear cell renal cell carcinoma (ccRCC) genomes by gene-directed copy number alteration (CNA) analysis
Source: PubMed Central journal article supplement (PMC5423597; doi:10.1371/journal.pone.0176659), 2017-05-09

# 3p21.31

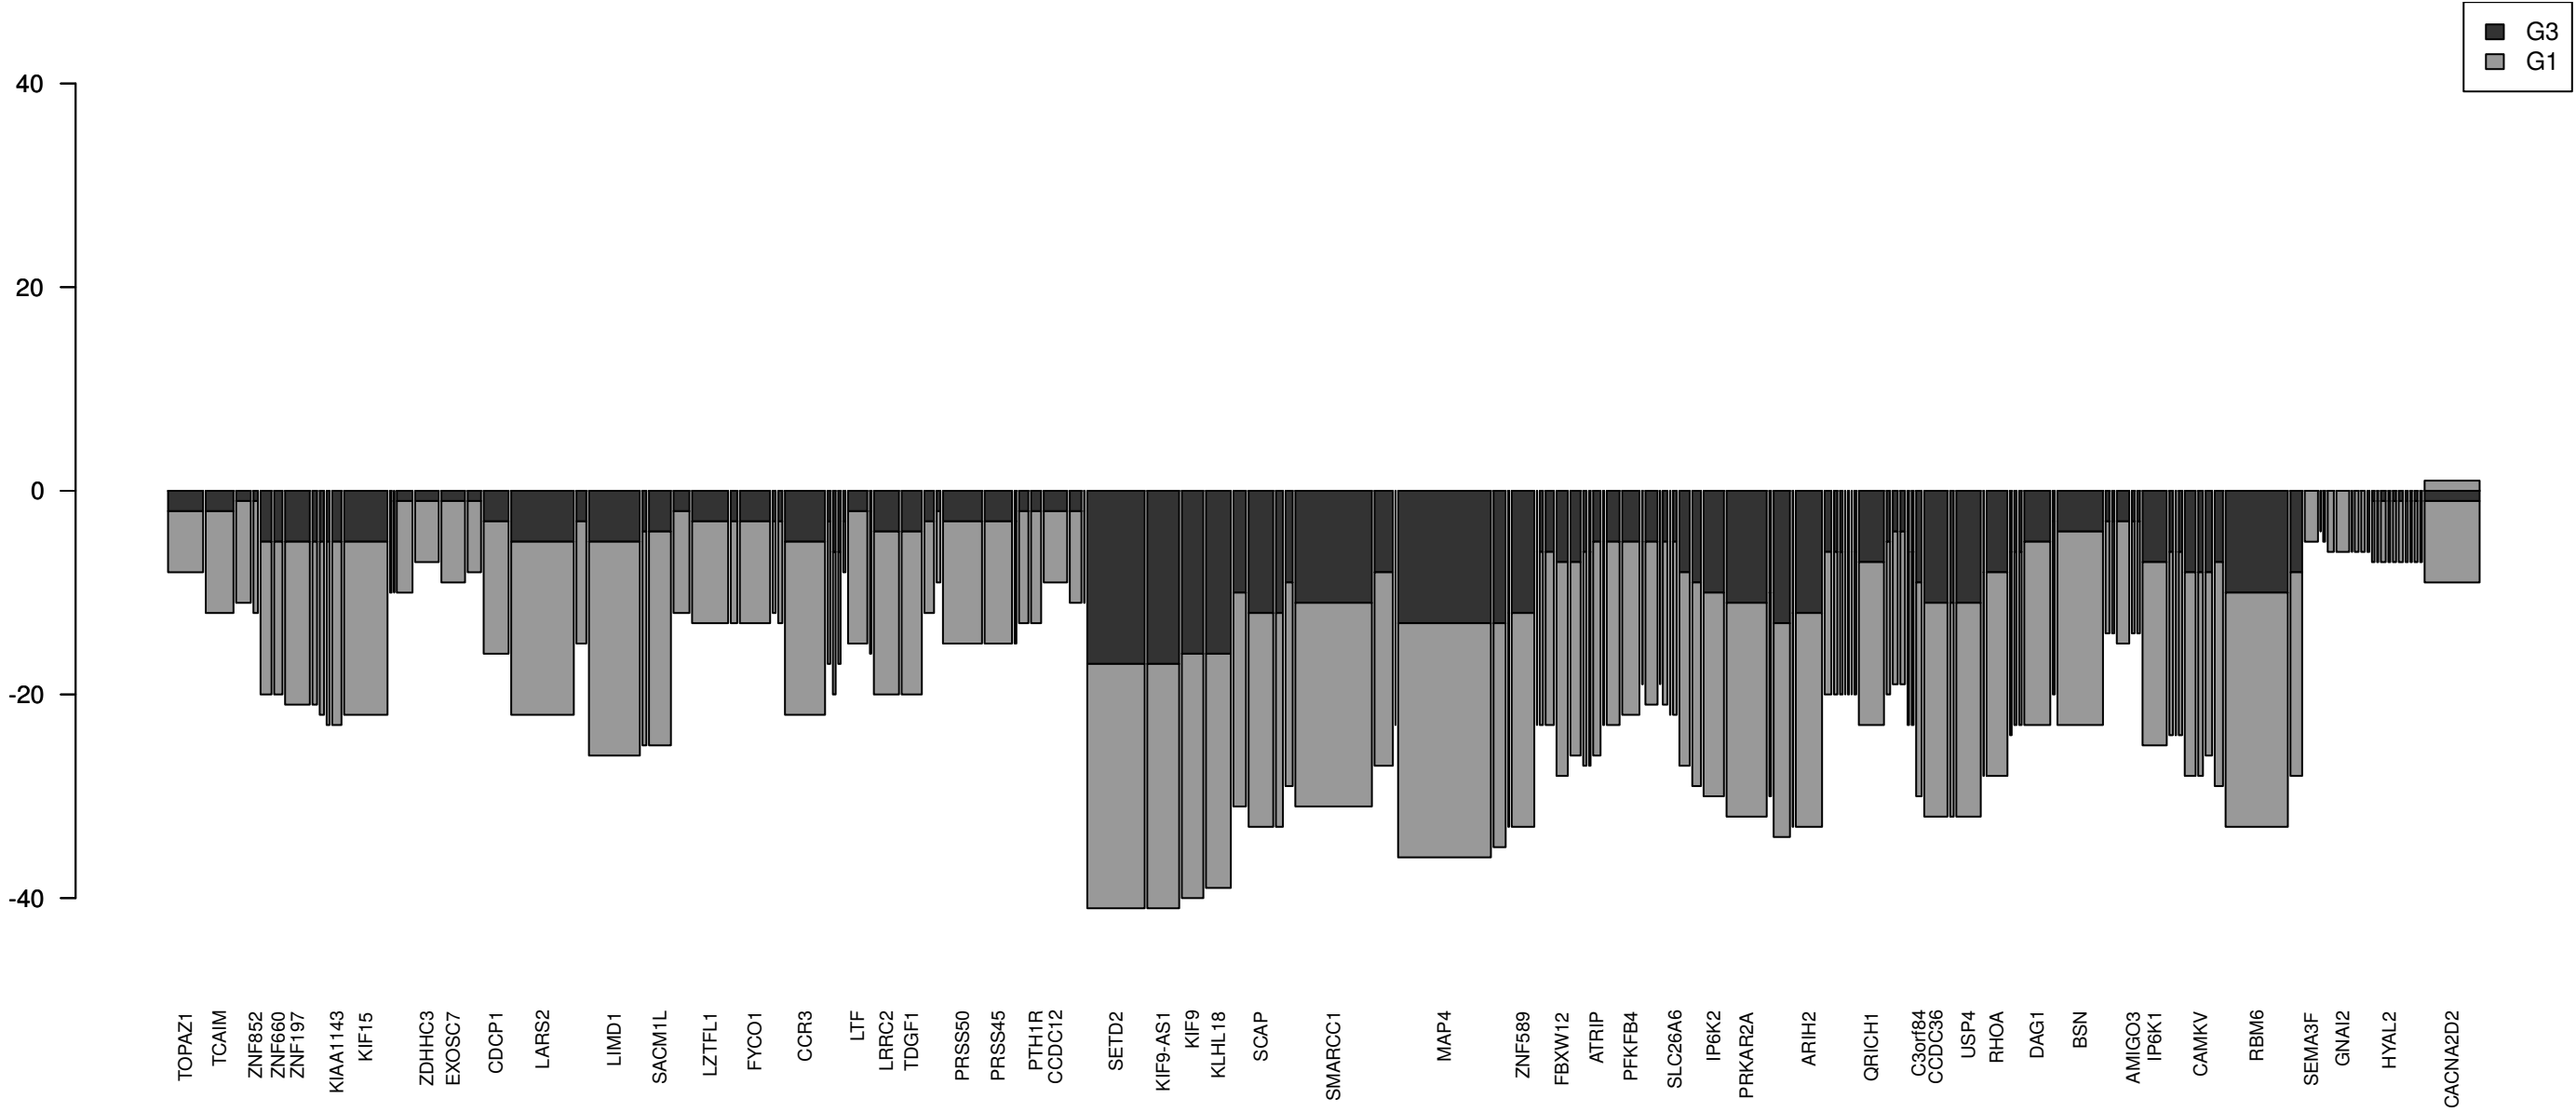

# 16p13.3

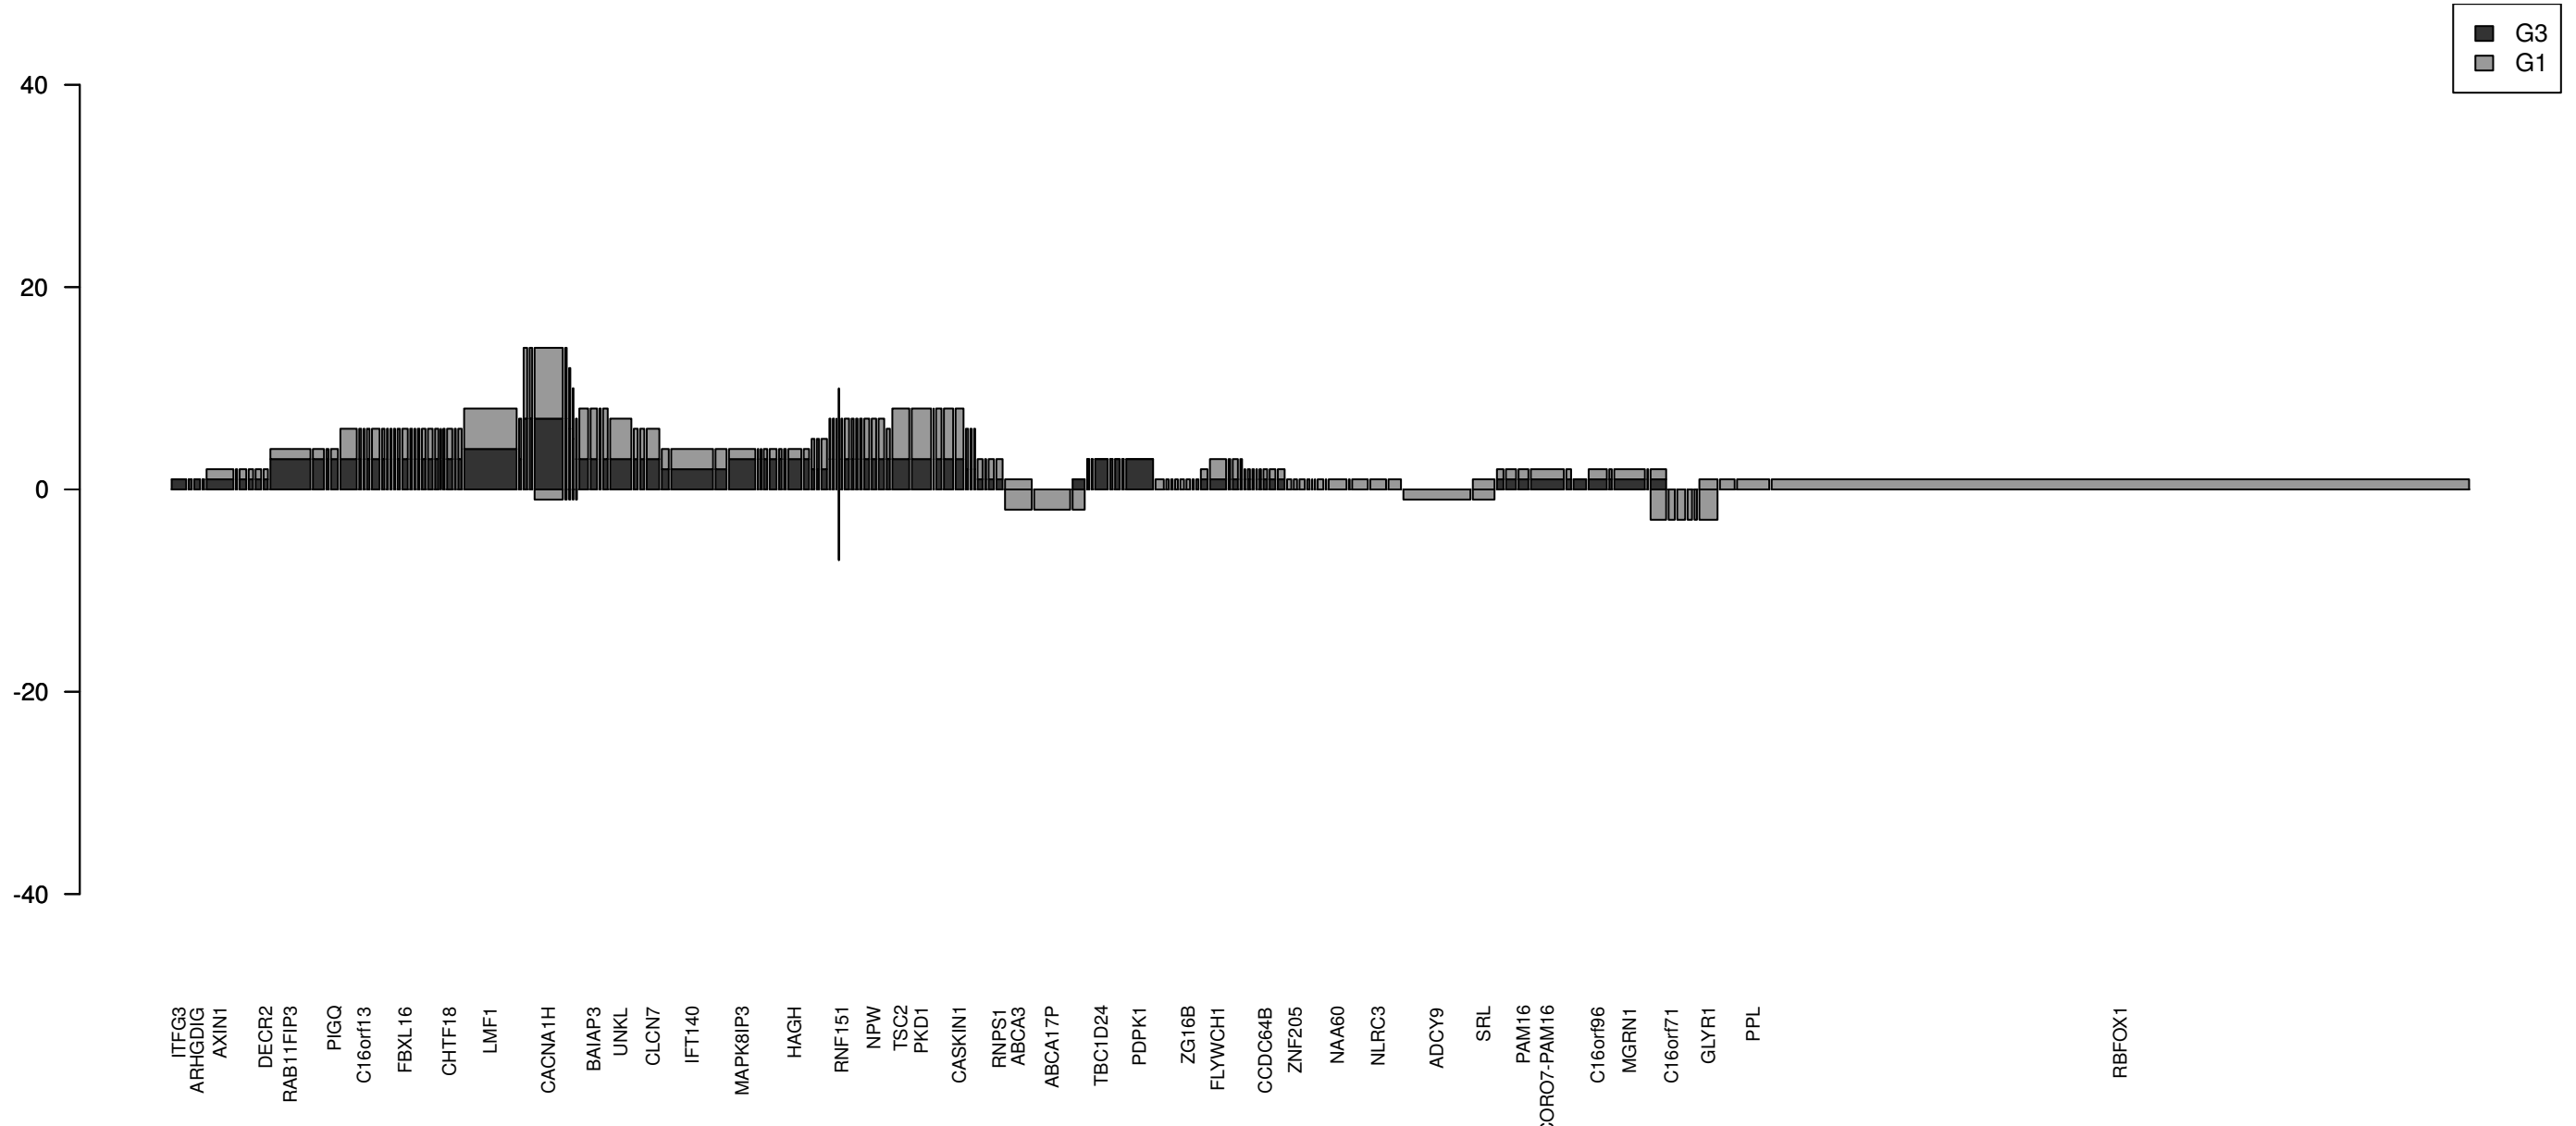

14q32.33 - G3\_603

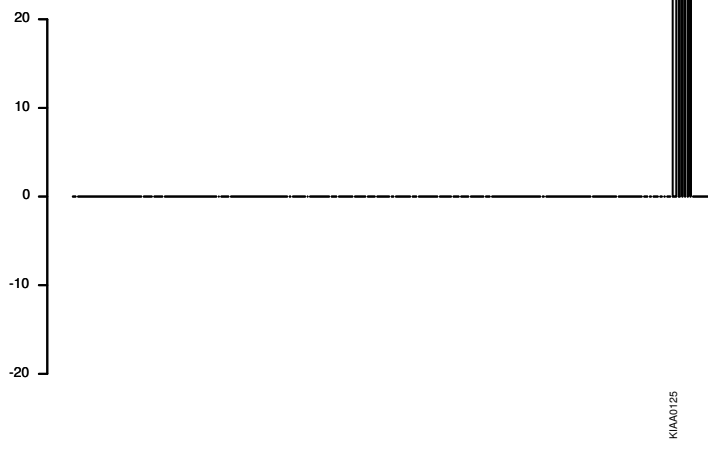

14q32.33 - G1\_142

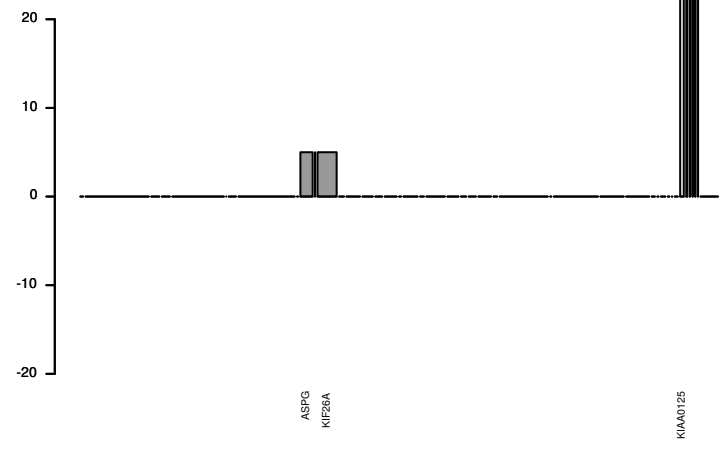

14q32.33 - G3\_30

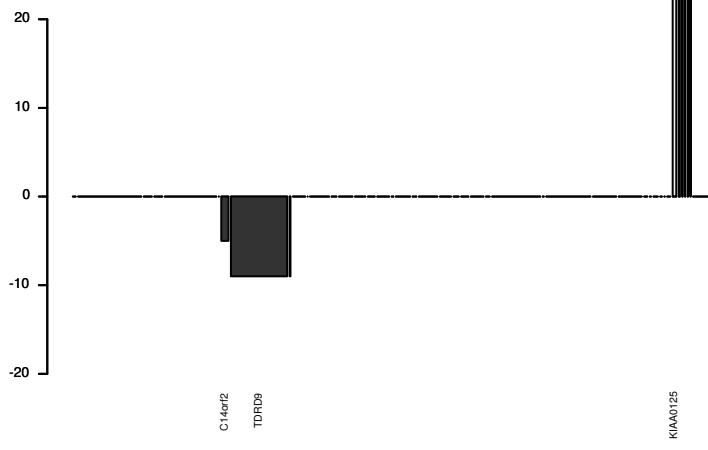

14q32.33 - G1\_196

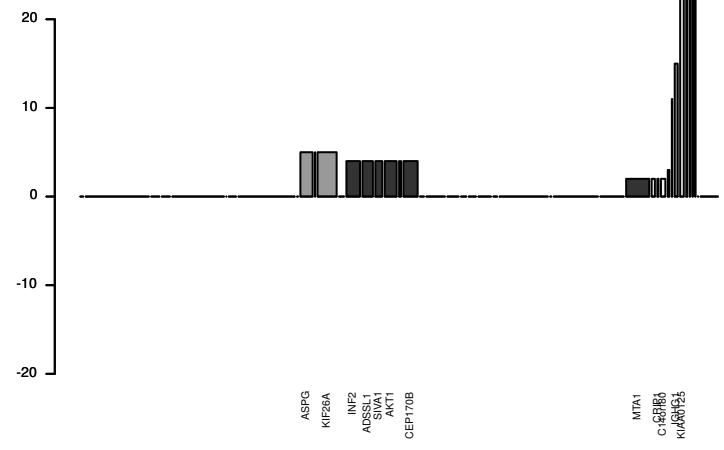

14q32.33 - G3\_576

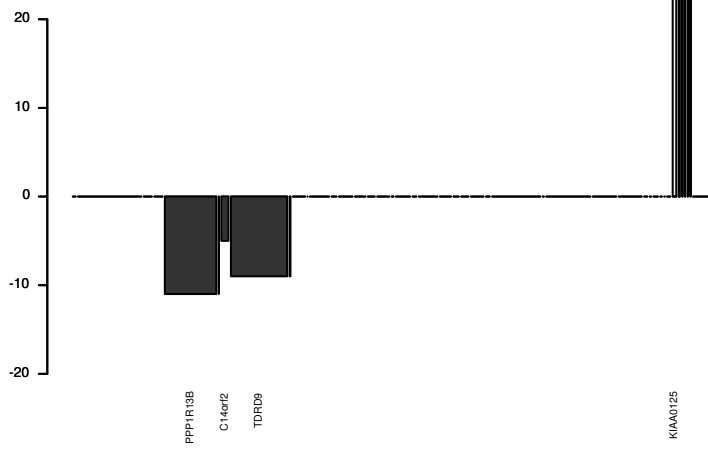

14q32.33 - G1\_22

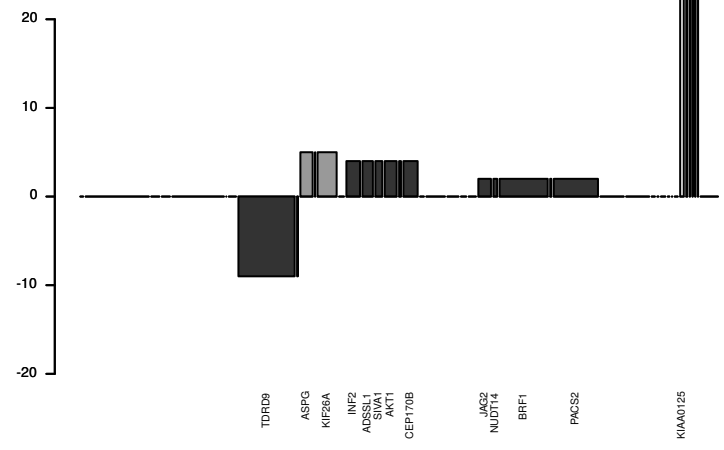

14q32.33 - G3\_537

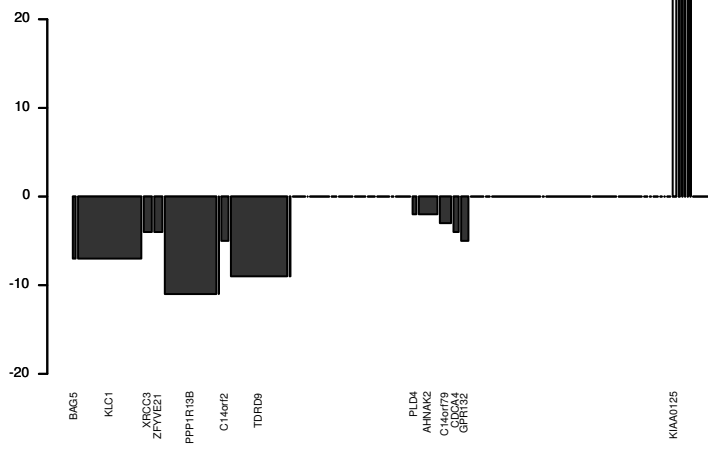

14q32.33 - G3\_183

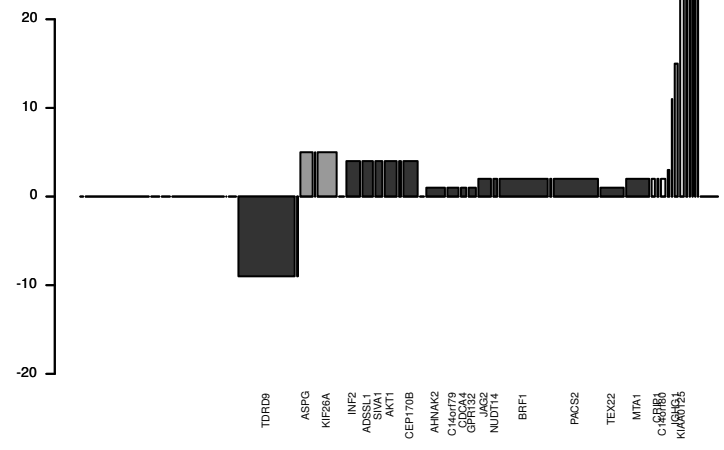

14q32.33

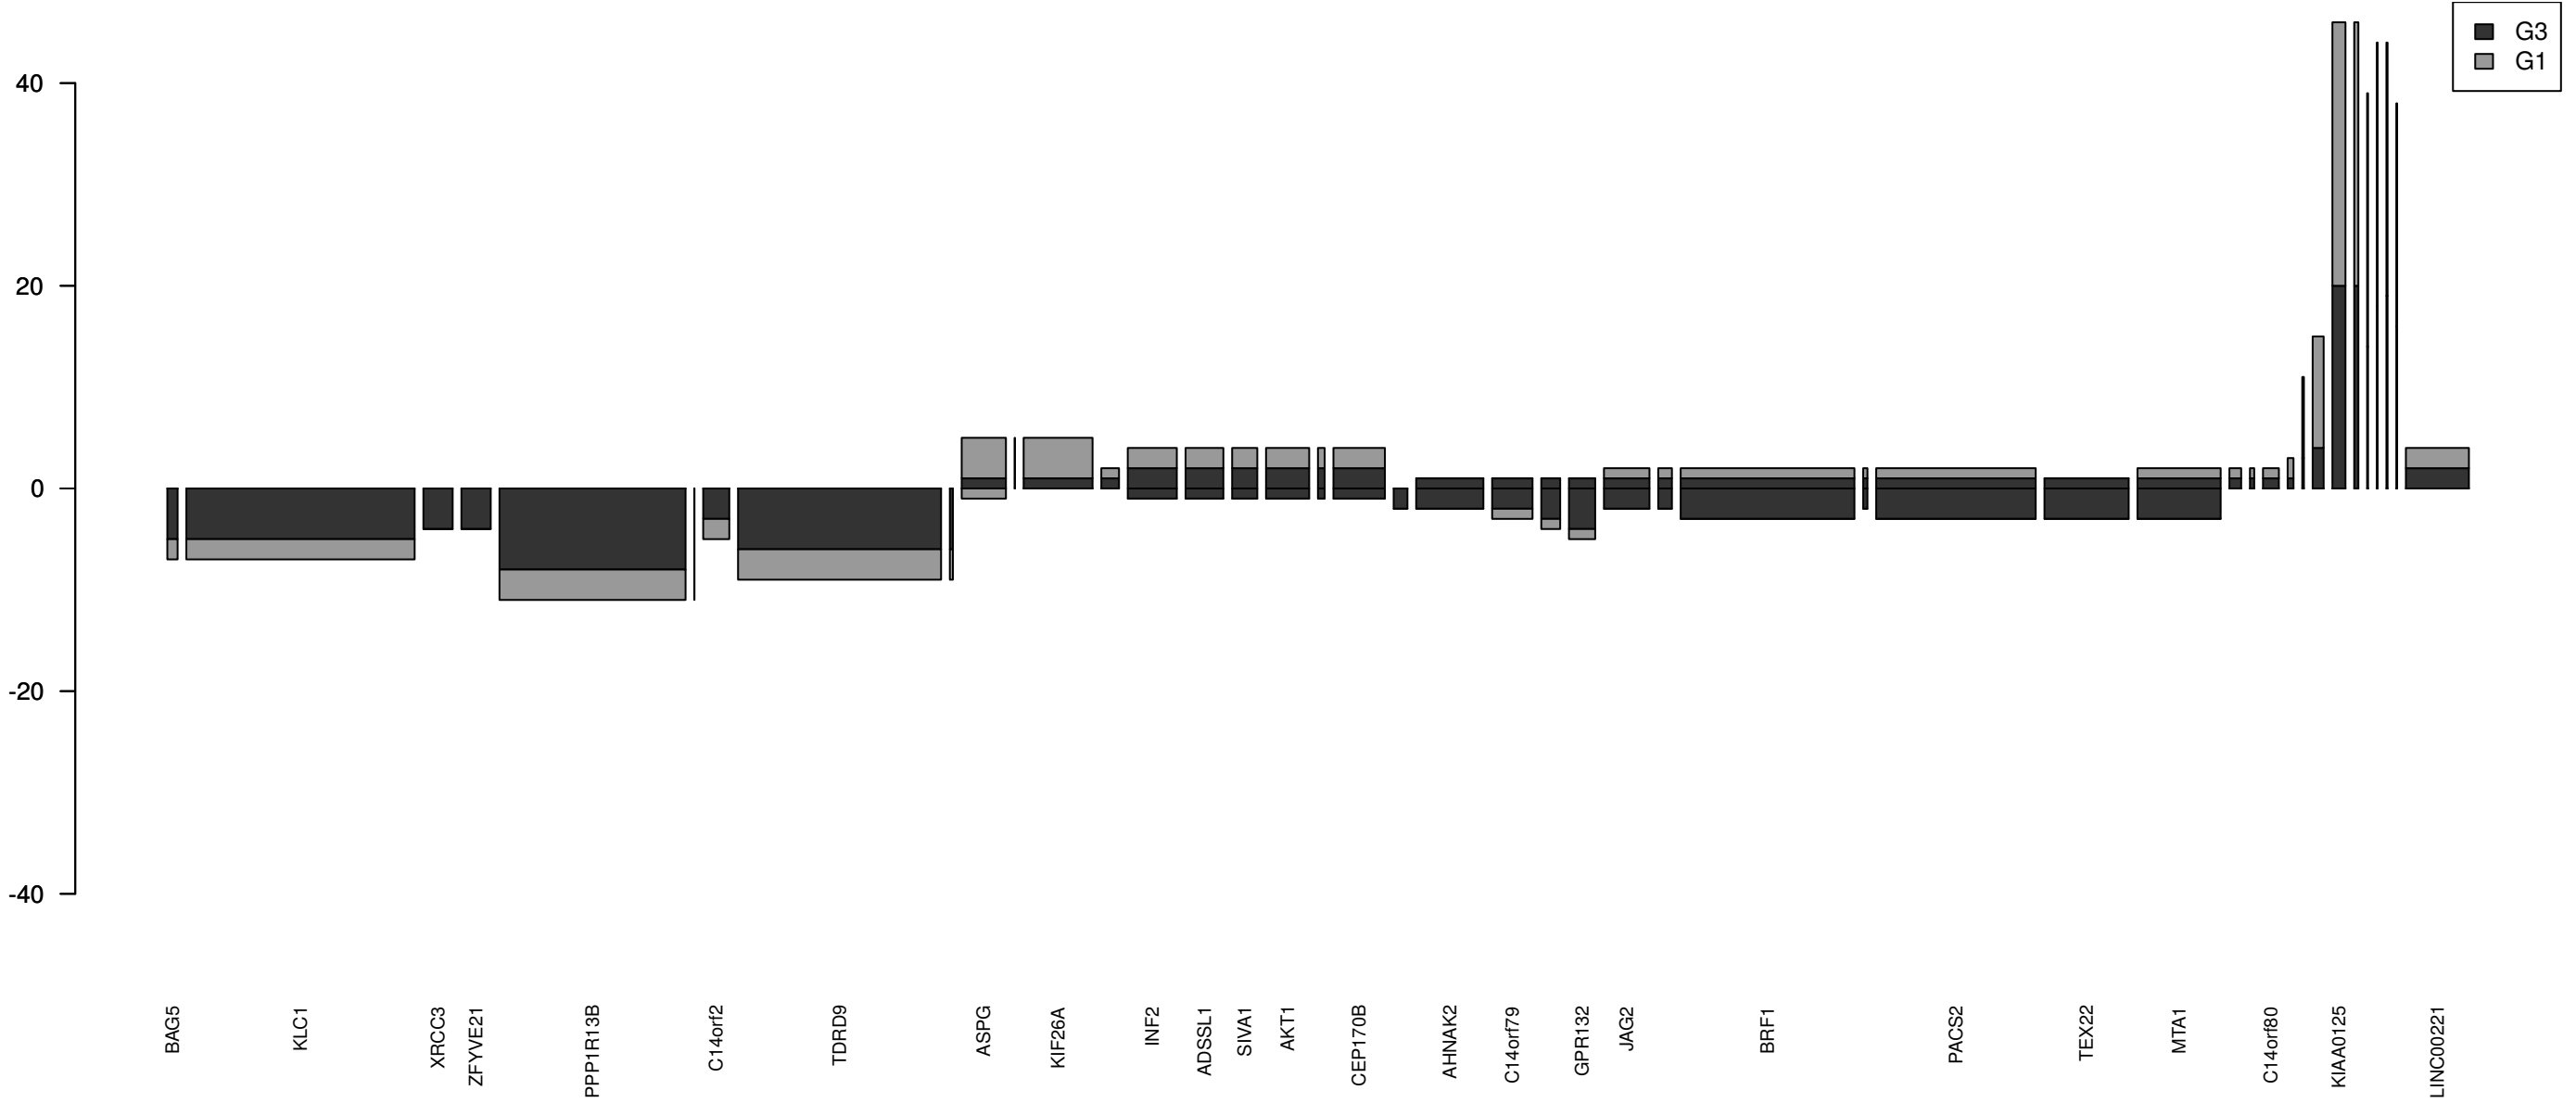

7q22.1

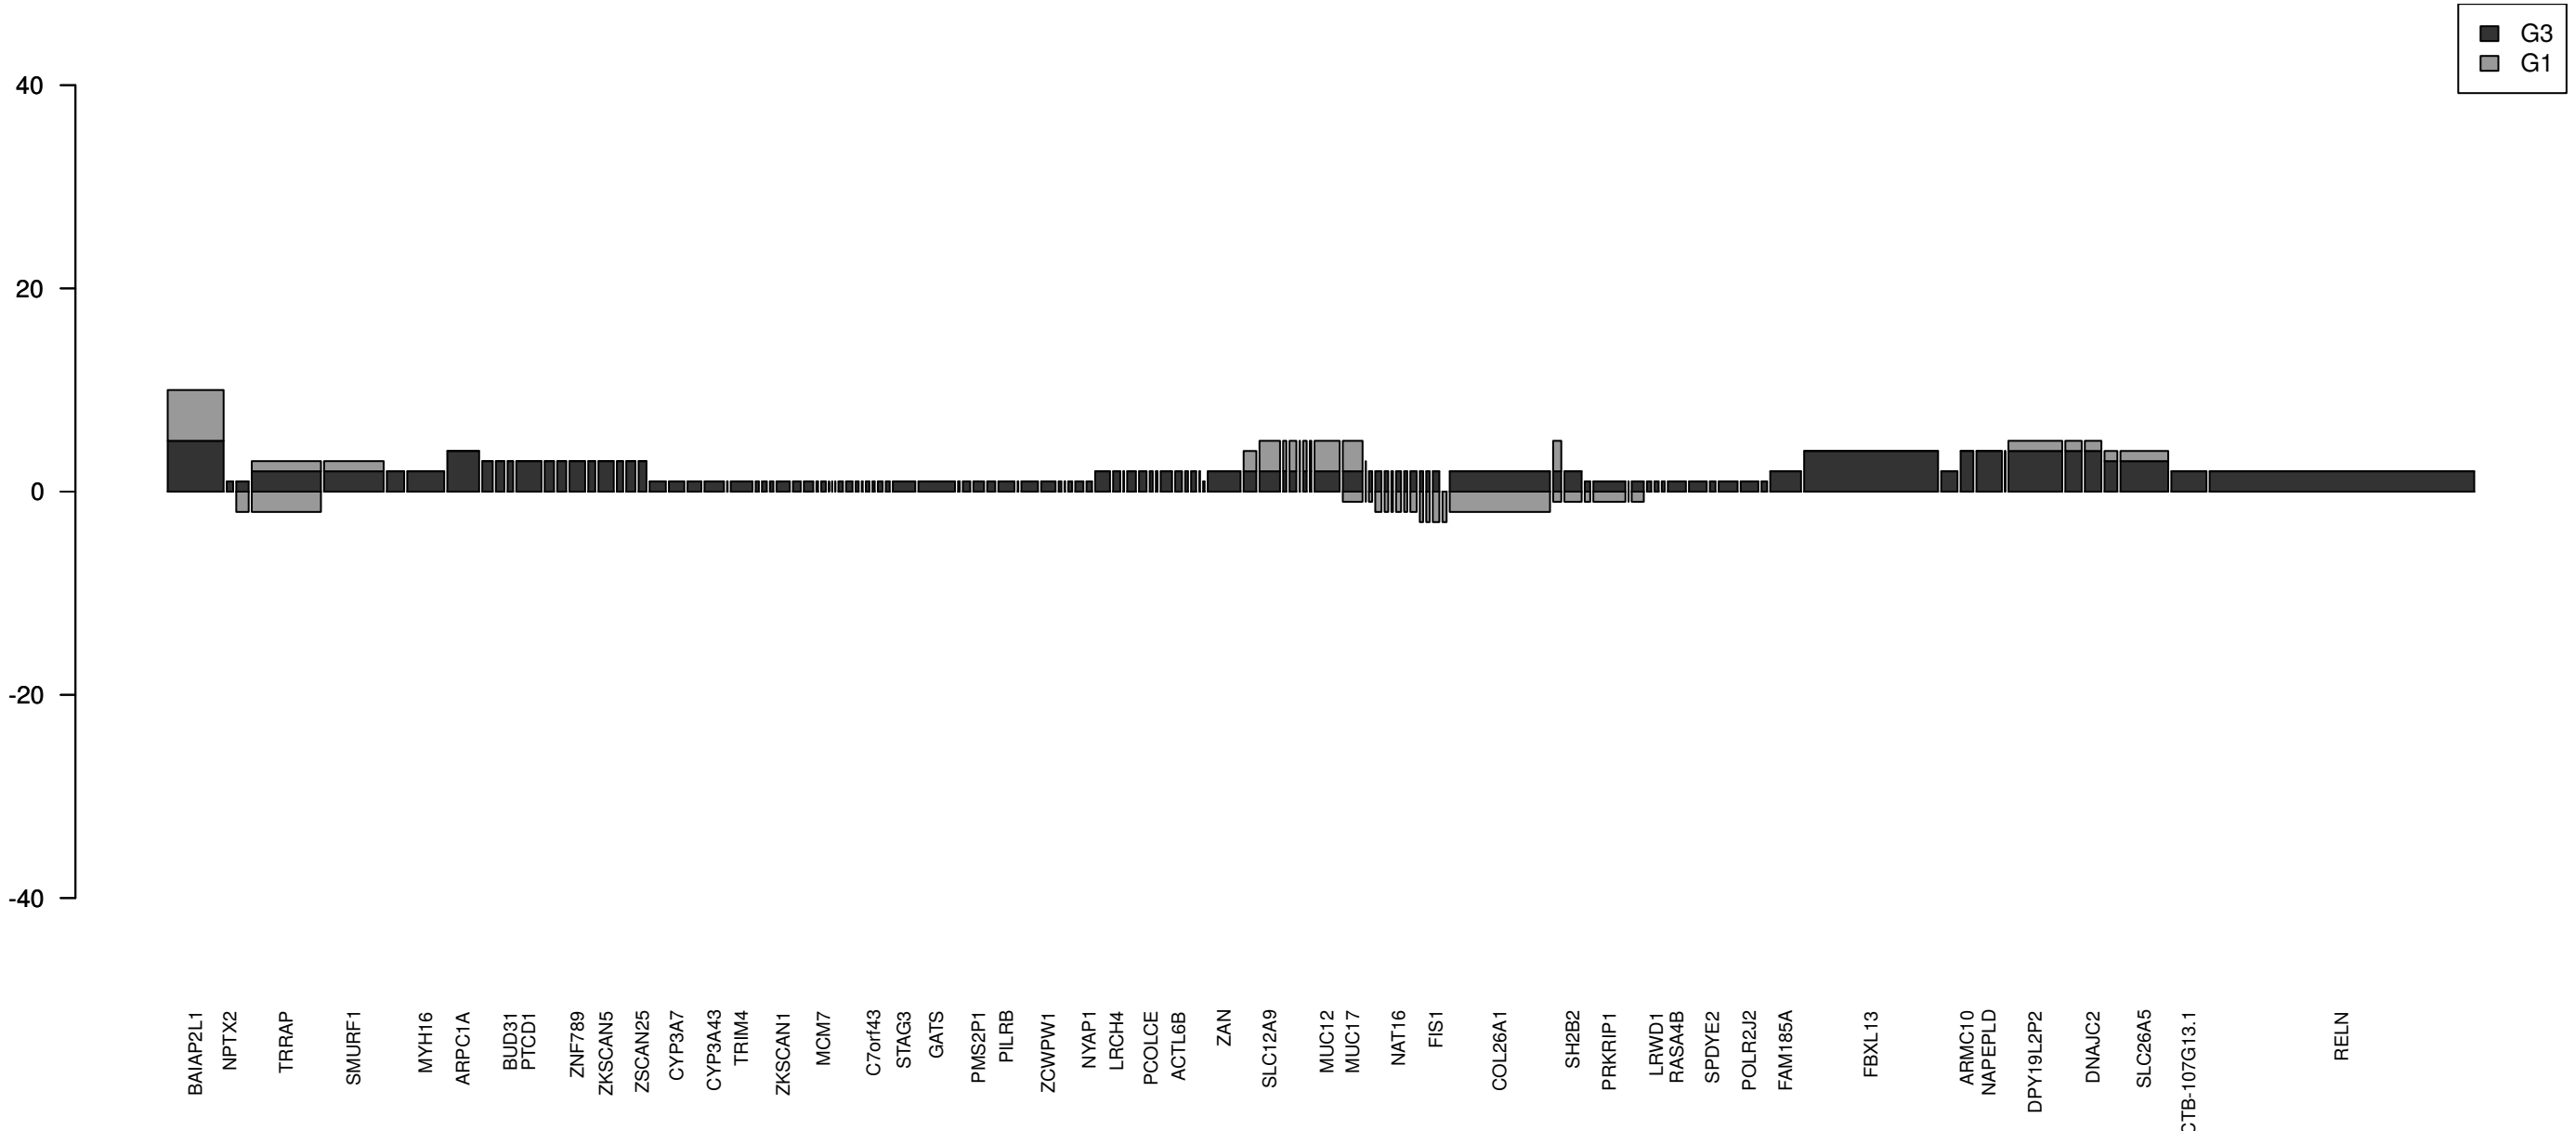

# 16p11.2

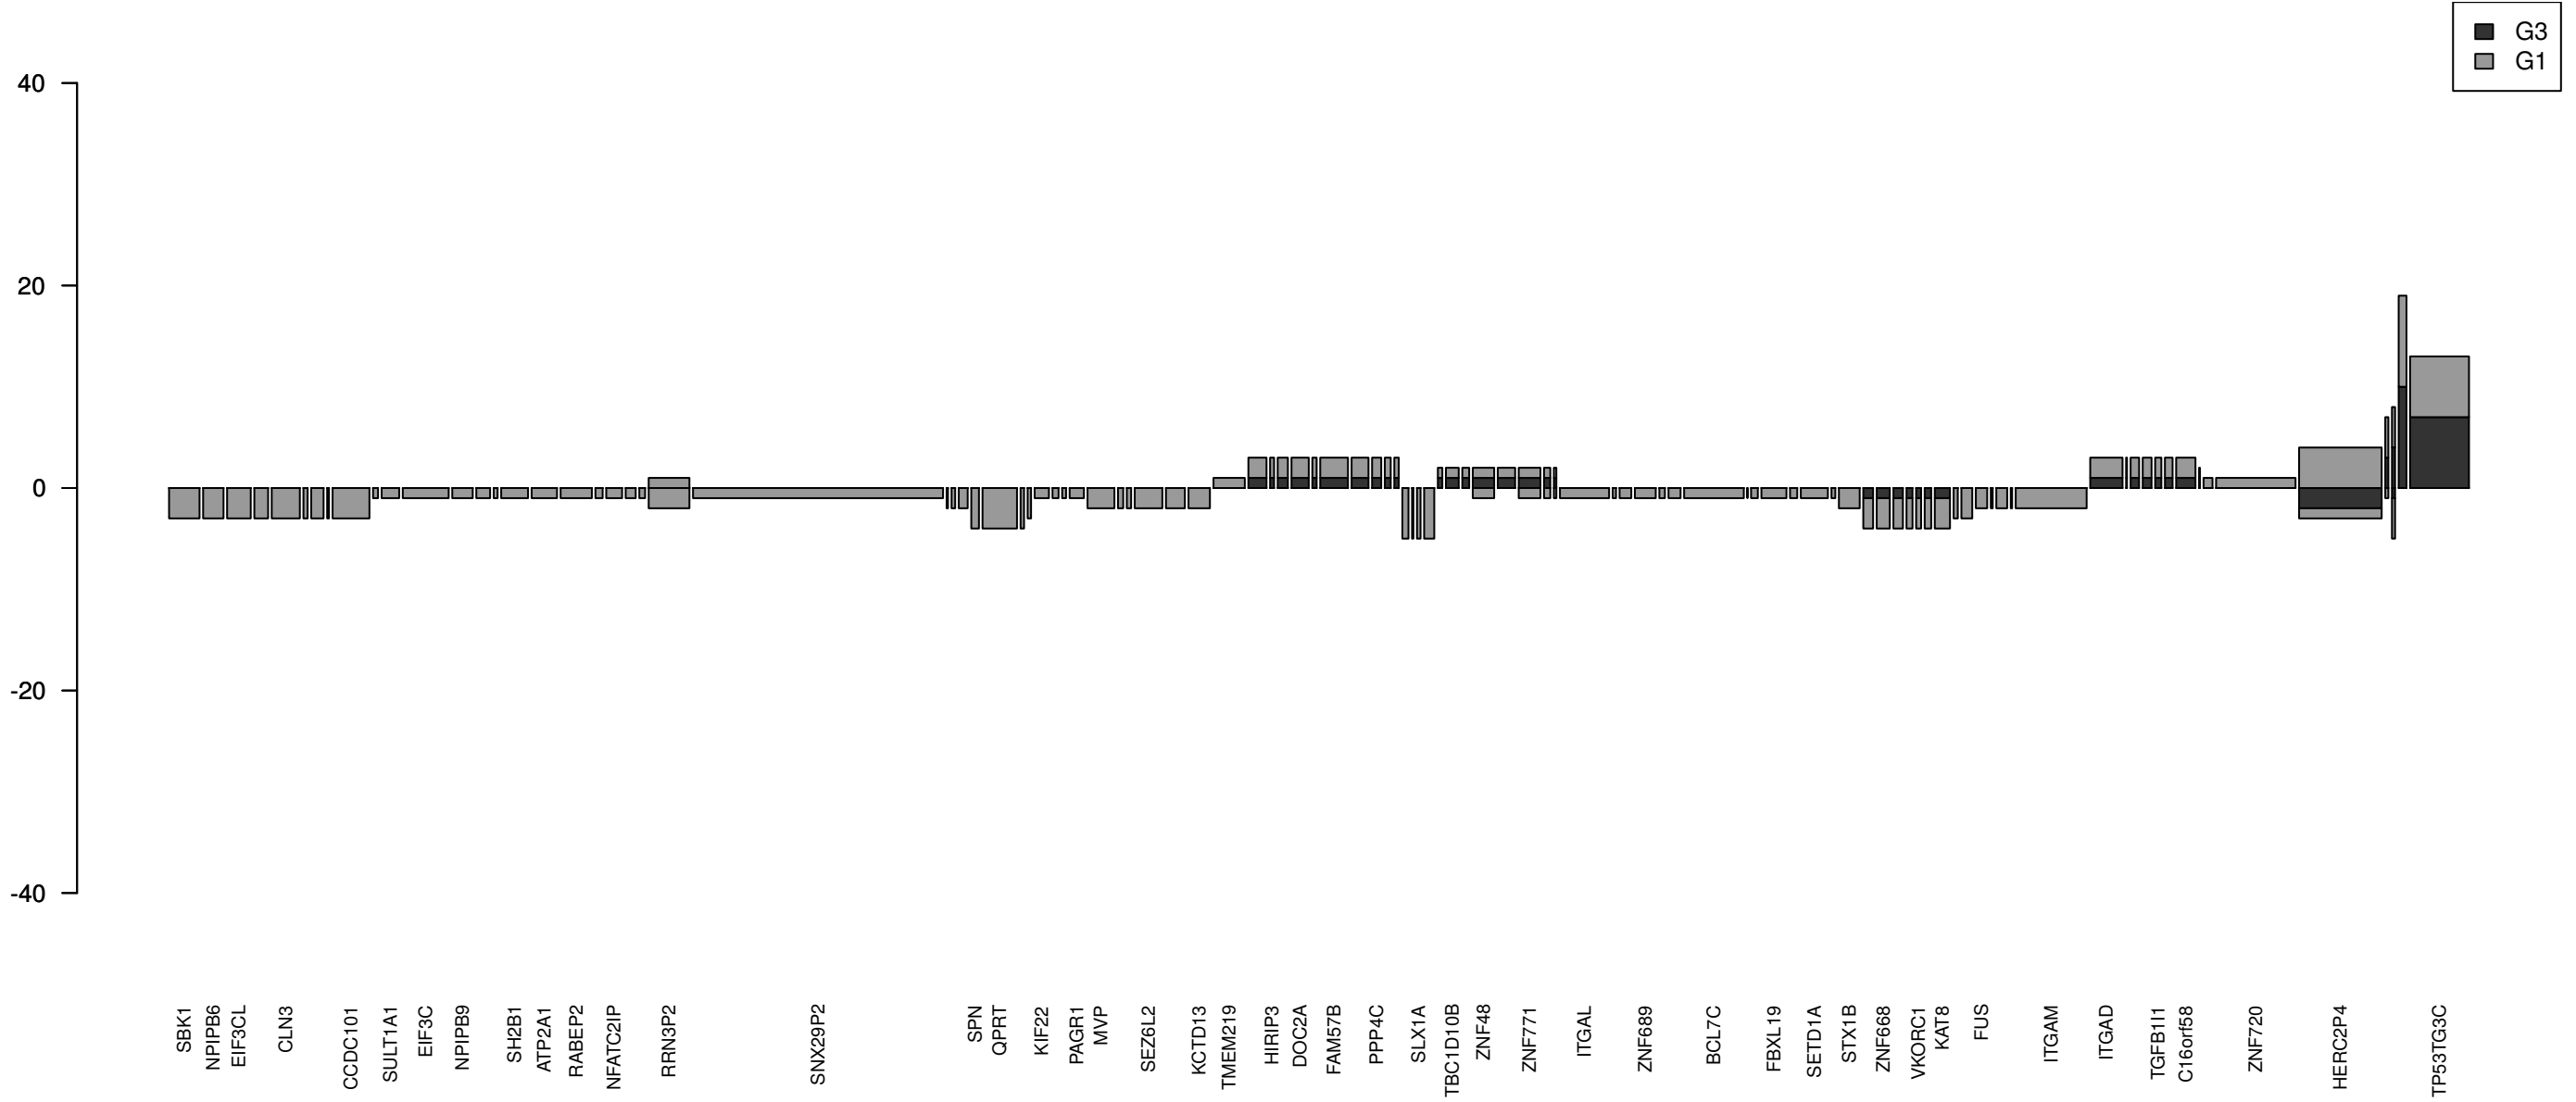

4p16.3 - G1\_286

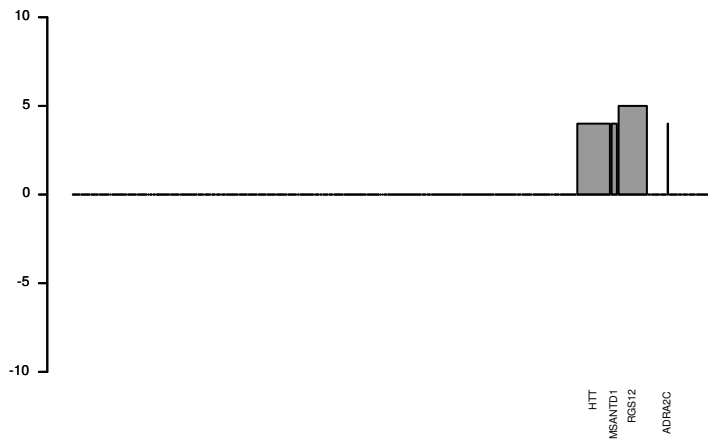

4p16.3 - G3\_526

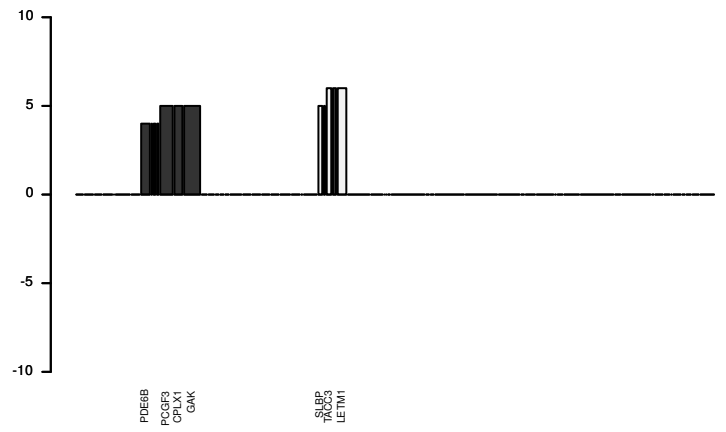

4p16.3 - G1\_294

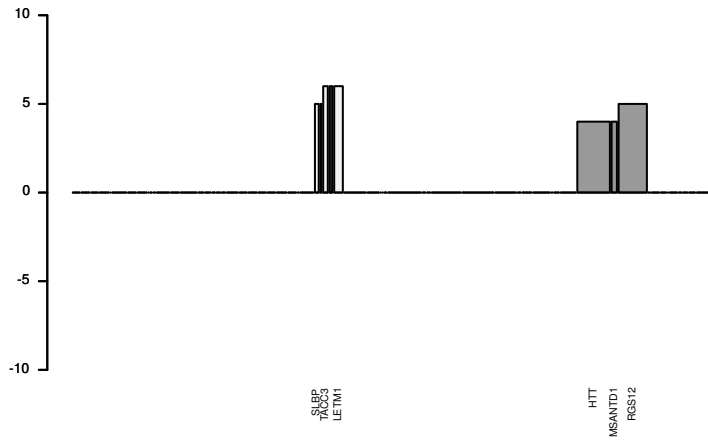

4p16.3 - G3\_30

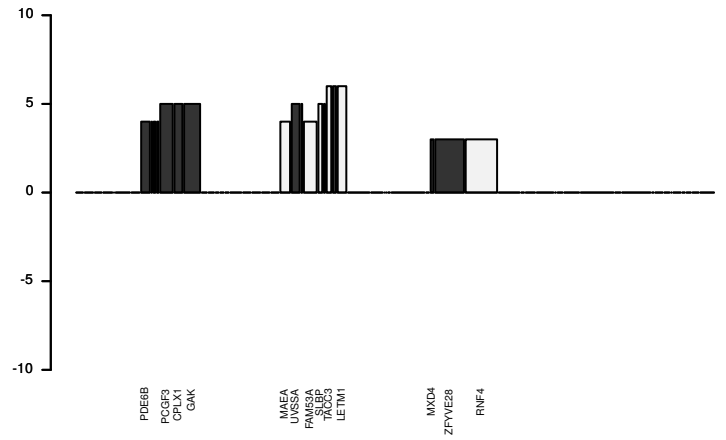

4p16.3 - G1\_290

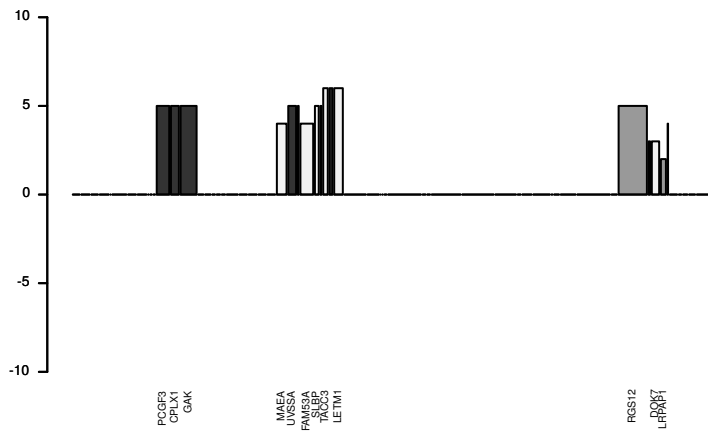

4p16.3 - G3\_531

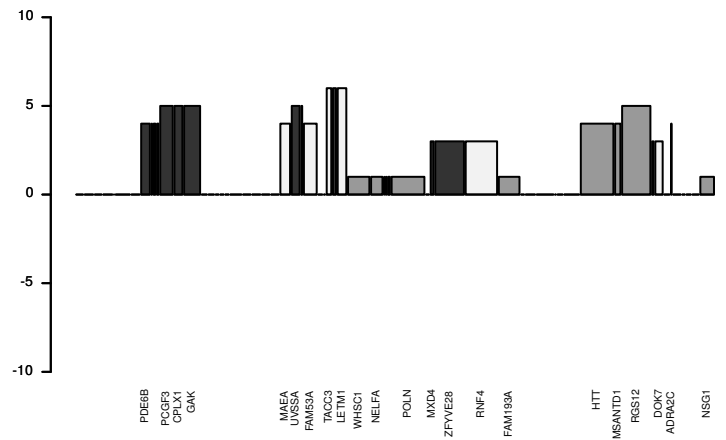

4p16.3 - G3\_183

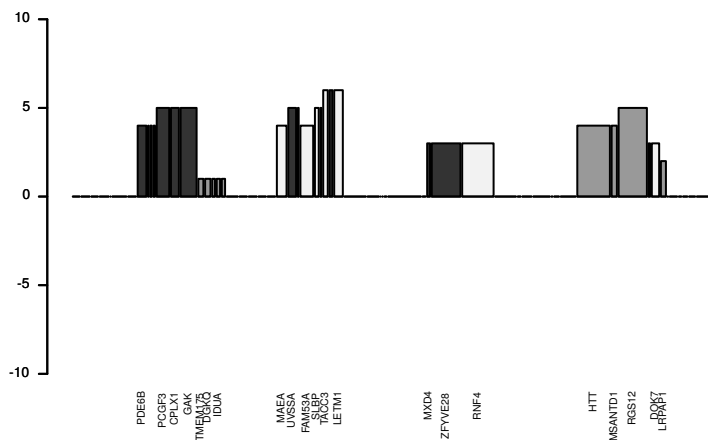

Supplement: pone.0176659.s004.pdf [file pone.0176659.s004.pdf]
